# Supplementary material for: Dexmedetomidine Acts via the JAK2/STAT3 Pathway to Attenuate Isoflurane-Induced Neurocognitive Deficits in Senile Mice
Source: PLoS One. 2016 Oct 21;11(10):e0164763. doi: 10.1371/journal.pone.0164763 (PMC5074497; doi:10.1371/journal.pone.0164763)
Supplement: S3 Table — (XLSX) [file pone.0164763.s003.xlsx]

## Sheet: Sheet1
Supplemental Table 3
Time spent in the third quadrant (S) and number of platform crossings during the probe testing: effects of isoflurane exposure and pretreatments: raw data.
Time spent in the third quadrant (S)
Animal ID	control	ISO	DEX	Atip	AG490	WP1066
1	45	24	32	23	22	21
2	38	17	33	23	29	24
3	23	19	41	25	26	19
4	29	32	29	21	32	24
5	42	19	30	29	18	18
6	32	10	29	33	33	32
7	41	19	29	23	28	13
8	44	16	39	16	22	29
9	37	32	33	14	12	29
10	39	22	24	18	16	22
11	41	20	39	27	12	19
12	28	22	31	19	23	34
13	29	16	28	29	21	23
14	38	21	21	24	24	19
15	33	19	31	25	14	27
16	43	17	31	21	21	21
Mean±SD	36±7	20±6	31±5	23±5	22±7	23±6
Number of platform crossings
Animal ID	control	ISO	DEX	Atip	AG490	WP1066
1	5	3	4	3	5	1
2	7	2	2	2	1	2
3	4	2	3	2	4	5
4	7	5	1	4	1	3
5	8	2	5	5	2	2
6	7	1	3	1	3	4
7	6	1	3	0	1	1
8	4	2	3	2	0	1
9	9	2	6	3	2	1
10	5	1	2	1	1	0
11	5	1	3	1	2	1
12	6	2	4	2	1	2
13	8	1	5	4	3	2
14	5	4	3	1	1	4
15	4	1	1	3	1	1
16	7	5	4	1	1	1
Mean±SD	6.1±1.6	2.2±1.4	3.3±1.4	2.2±1.4	1.8±1.3	1.9±1.4
